# Supplementary material for: Discharge communication practices in pediatric emergency care: a systematic review and narrative synthesis
Source: Springer Nature journal article supplement (doi:10.1186/s13643-019-0995-7), 2019-04-03
Supplement: MOESM1 [file 16600260]

*Emergency Setting:*

1. ((Emergen\* or urgen\* or critical) adj3 (service\* or care or department\* or centre\* or center\* or room\*)).tw.
2. exp emergency service, hospital/

*Child/Parent Population:*

3. exp child/
4. exp infant/
5. adolescent/
6. exp parents/
7. exp legal guardians/
8. infan\*.tw.
9. child\*.tw.
10. preschool.tw.
11. (babies or baby).tw.
12. neonat\*.tw.
13. youth.tw.
14. young.tw.
15. parent\*.tw.
16. p?ediatr\*.tw.
17. teen\*.tw.

*Terms for Discharge*

18. patient discharge/
19. patient transfer/
20. convalescence/
21. discharg\*.tw.
22. transfer\*.tw.
23. releas\*.tw.
24. follow up or followup.tw.
25. Follow-Up Studies/
26. aftercare/

*Instructions Interventions:*

27. education/
28. Patient education as topic/
29. patient education handout.pt.
30. self care/
31. "models, educational"/
32. pamphlets/
33. continuity of care/
34. education.tw.
35. (discharg\* adj3 (information or advice or educat\*)).tw.
36. ((patient\* or carer\* or parent\*) adj3 information).tw.
37. ((patient\* or carer\* or parent\*) adj3 educat\*).tw.
38. continuity of patient care/
39. (continuity adj3 care).tw.
40. medical information.tw.
41. written information.tw.

42. pamphlet\*.tw.
43. (booklet\* or brochure\* or leaflet\$ or postcard\*).tw.
44. 1 or 2
45. or/3-17
46. or/18-26
47. or/27-43
48. 44 and 45
49. 48 and 46
50. 49 and 47

Other possible search terms for the emergency care setting:

Emergencies/

Emergency Medical Technicians/

Emergency Medicine/

Emergency Treatment/

exp Emergency Medical Services/

Outpatient Clinics, Hospital/

Outpatients/

((accident\* or casual\*) adj3 (service\* or department\* or room\* or center\* or centre\* or clinic or clinics or unit\*)).tw.

((acute or emerg\*) adj3 care).tw.

(ED or EDs or ER or ERs or EMS).tw.

(emerg\* adj3 (department\* or room\* or ward\* or unit\* or hospital\* or clinic or clinics or patient\* or physician\* or doctor\* or treatment\*)).tw.

(emerg\* adj3 (technician\* or practitioner\* or dispatch\*)).tw.

(emergicenter\* or emergicentre\*).tw.

((out-patient\* or outpatient\*) adj3 (service\* or department\* or room\* or center\* or centre\* or clinic or clinics or unit\*)).tw.

((prehospital or pre-hospital) adj3 (emergenc\* or care\*)).tw.

(primary adj3 care).tw.

(trauma adj3 (center\* or centre\* or clinic or clinics)).tw.

(urgent adj3 care).tw.

((walkin or walk-in) adj3 (service\* or department\* or room\* or center\* or centre\* or clinic or clinics or unit\*)).tw.
